# Supplementary material for: Nuclear constriction segregates mobile nuclear proteins away from chromatin
Source: PubMed Central journal article supplement — Mol Biol Cell. 2016 Dec 15;27(25):4011–20. doi: 10.1091/mbc.E16-06-0428 (PMC5156542; doi:10.1091/mbc.e16-06-0428), 2016-12-15
Supplement: supp_E16-06-0428v1_CombinedSupMats.pdf [file supp_E16-06-0428v1_CombinedSupMats.pdf]

# Supplemental Materials

*Molecular Biology of the Cell*

Irianto et al.

**Fig. S1. GFP-53BP1 do not occupy nucleolus regions and YFP-NLS also segregates in small 3  $\mu\text{m}$  constrictions**

(A) U2OS cells were co-transfected with GFP-53BP1 and mApple-Fibrillarin, which indicates the presence of nucleoli. The representative image clearly show the exclusion of GFP-53BP1 and Hoechst stained DNA from the nucleoli.

(B) Representative images showing the segregation of YFP-NLS-MS2 inside the 3  $\mu\text{m}$  pore.

**Fig. S2. Acetylated histone H3 follows DNA behavior in constrictions.**

(A,B) Following DNA behavior, the level of acetylated histone H3 (acetyl-H3) is enriched within the 3  $\mu\text{m}$  pore constrictions, hence the intensity ratio is above one ( $\geq 15$  cells;  $n = 2$  expts). However, the enrichment of acetyl-H3 is not as high as the DNA, probing the need to test acetyl-H3 antibody specificity. (C) Indeed, inhibition of histone deacetylase by 300 nM Trichostatin A for 12 hours resulted in an increase in acetyl-H3 level, as shown by the antibody immunostaining ( $\geq 120$  cells per group,  $*p < 0.05$ )

**Fig. S3. Mobile protein segregation is an unavoidable physical effect of nuclear constriction.**

Well over 90% of aspirated cells exhibit segregation; even those that do not appear to be within statistical uncertainty of doing so ( $\geq 4$  cells per group;  $n \geq 3$  expts).

**Fig. S4 Nuclear FokI levels are higher with addition of tamoxifen and seem to accumulate over time.** Nuclear FokI levels increase with the addition of tamoxifen to the 1  $\mu\text{M}$  Shield1 treated cells. The amount of FokI in the nuclei is higher at 24 hours, when compared to the 6 hours treated cells ( $\geq 100$  cells per group,  $n \geq 2$  expts,  $*p < 0.05$ ,  $**p < 0.01$ ).

**Fig. S5 H2B-GFP at the FokI foci are not depleted over time.**

(A) Representative images of the observation of H2B-GFP and mCherry-FokI levels at the FokI focus region, over a period of 20 minutes. Intensity profiles across the FokI foci and the surrounding H2B-GFP show the depletion of FokI at the focus, but not H2B-GFP.

(B,C) Intensity profiles of two different nuclei, also show the depletion of FokI, but not H2B-GFP.

# Figure S1

GFP-Ku80 also segregates in small 3  $\mu\text{m}$  constrictions

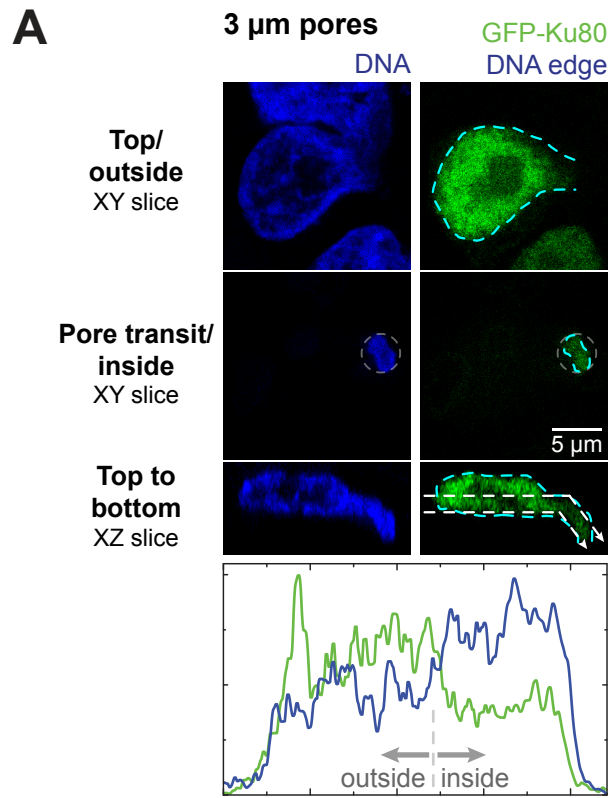

Nuclear GFP-53BP1 proteins are excluded from the nucleoli

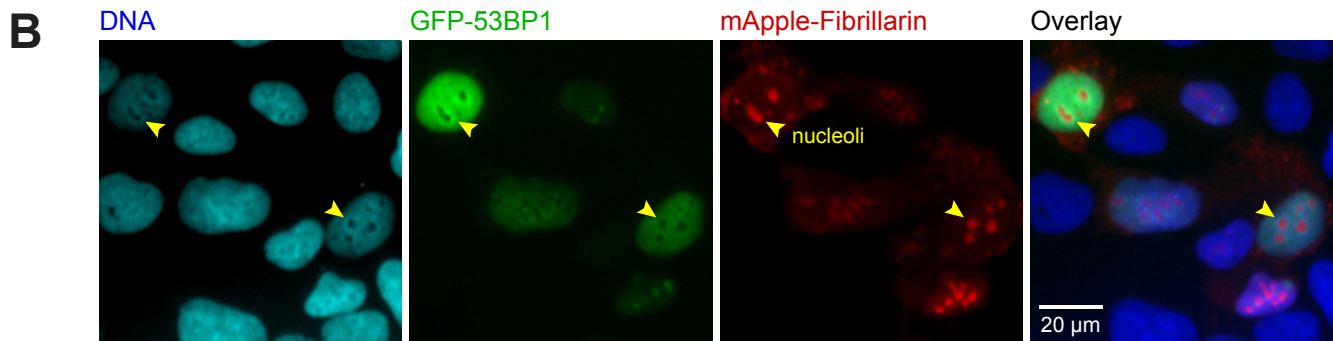

# Figure S2

Acetylated histone H3 follows DNA and other chromatin-bound proteins behaviour in constrictions

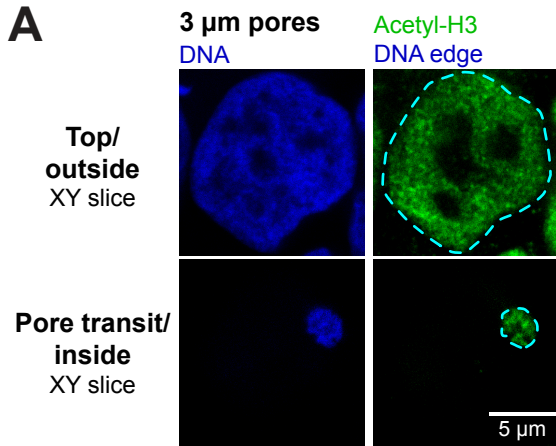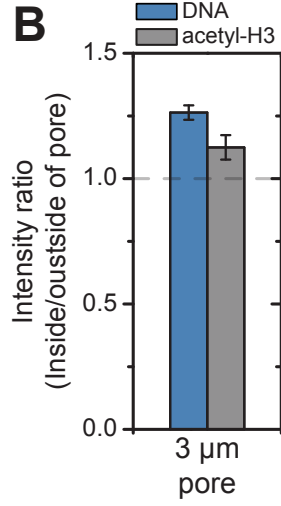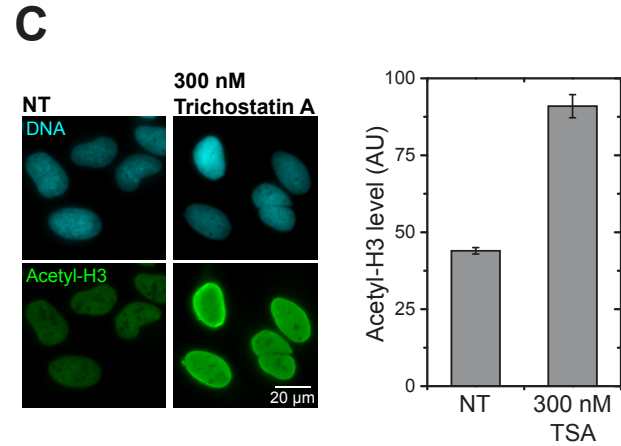

# Figure S3

Scatter plot of intensity ratio data shows >90% of (DNA measurement  $\geq 1.0$ ) and (mobile factors  $\leq 1.0$ )

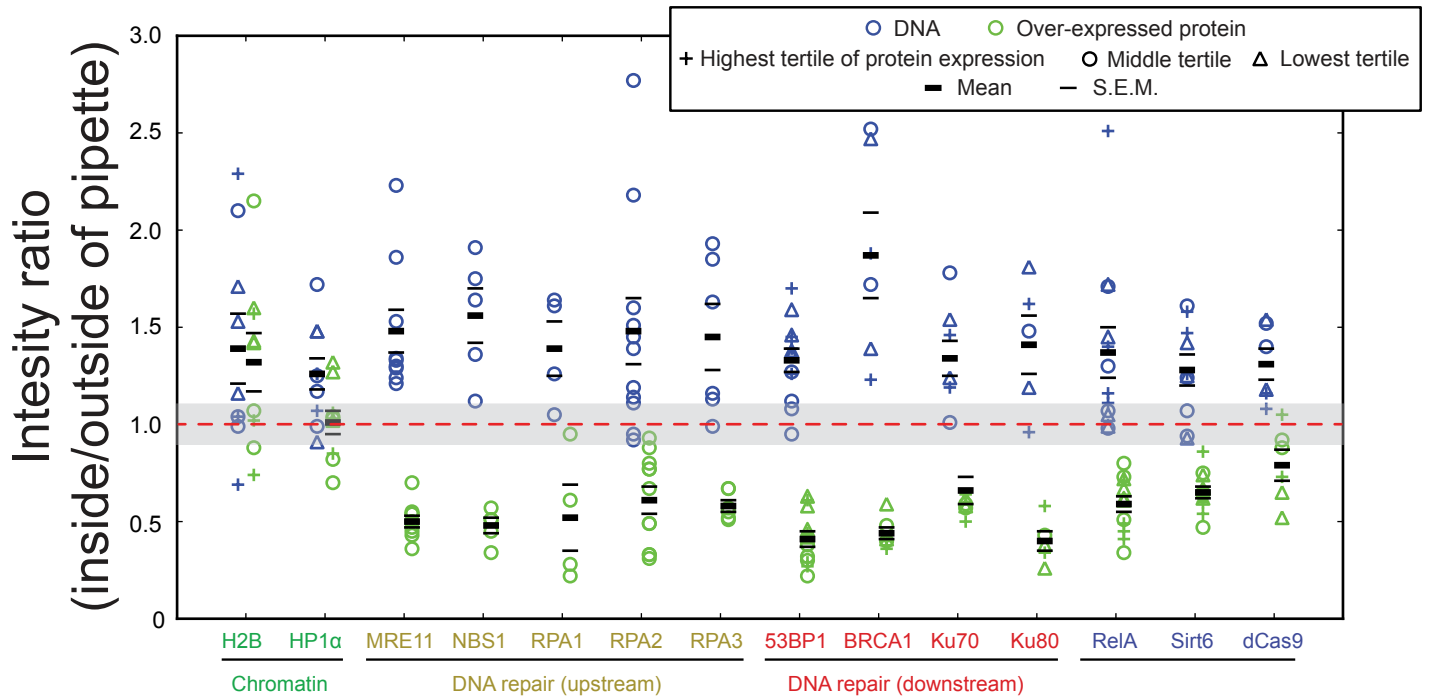

# Figure S4

Nuclear FokI levels are higher with addition of Tamoxifen and seem to accumulate over time

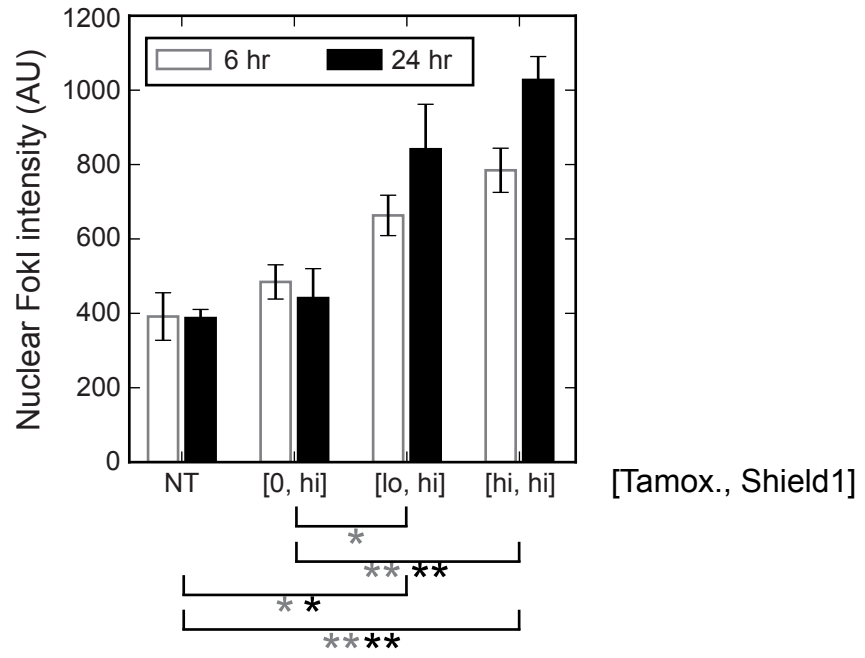

# Figure S5

H2B remains in the FokI locus site during aspiration

**A**

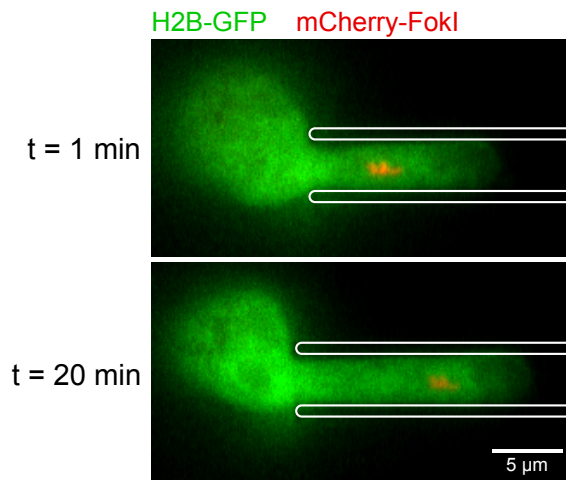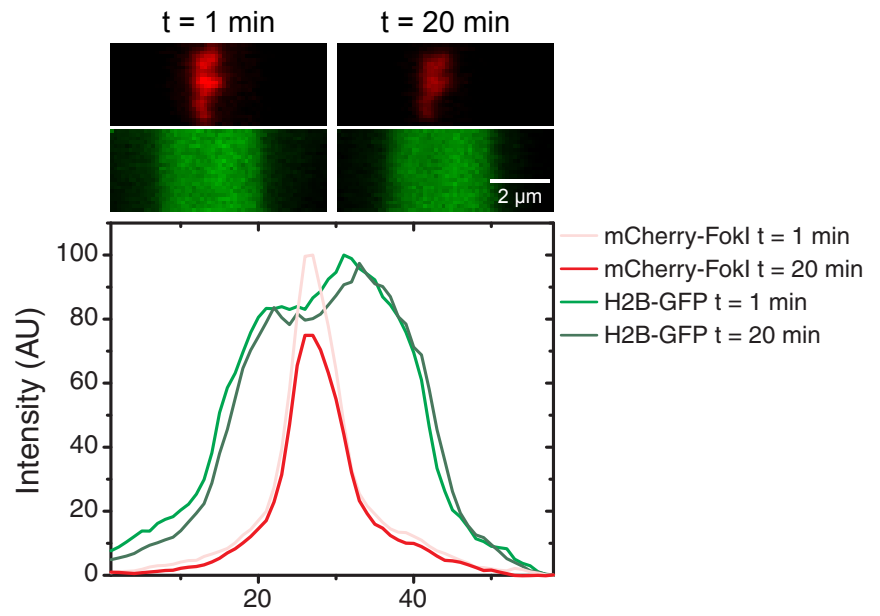

**B**

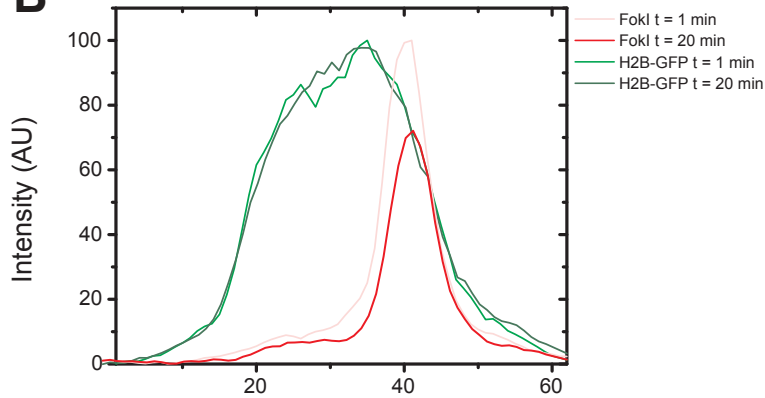

**C**

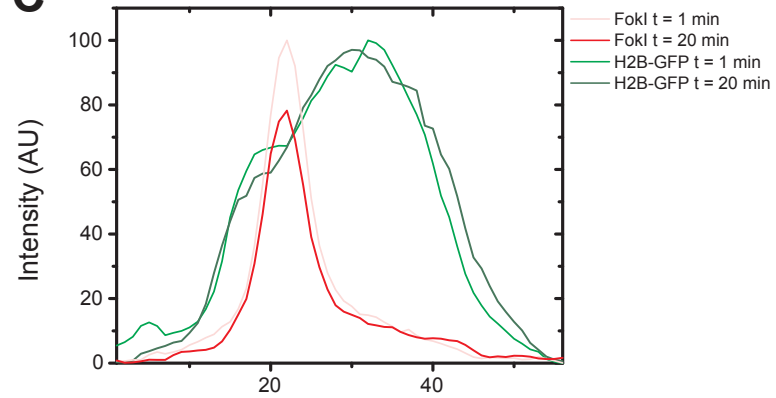

**Table S1** FRAP data of non-foci bound nucleoplasmic GFP-tagged protein

| GFP-tagged protein | Molecular weight <sup>[S1]</sup> , kDa (+GFP) | Estimated Isoelectric point, pI <sup>[S1]</sup> (+GFP) | Mobile fraction        | recover half-time | recover time |
|--------------------|-----------------------------------------------|--------------------------------------------------------|------------------------|-------------------|--------------|
| RPA3               | 14 (41)                                       | 4.8 (5.2)                                              |                        |                   |              |
| GFP                | 27                                            | 5.4                                                    | 95% <sup>[S2,3]</sup>  | 1 s               | 4-7 s        |
| RPA2               | 29 (56)                                       | 5.4 (5.5)                                              |                        |                   |              |
| Sirt6              | 35 (62)                                       | 6.0 (5.7)                                              |                        |                   |              |
| YFP-MS2            | 42                                            | 5.6                                                    |                        |                   |              |
| RelA               | 60 (87)                                       | 5.3 (5.4)                                              | 95% <sup>[S3]</sup>    | 1 s               | 7 s          |
| RPA1               | 68 (95)                                       | 6.5 (5.8)                                              | 95% <sup>[S4]</sup>    | 8 s               | 30 s         |
| Ku70               | 70 (97)                                       | 6.1 (5.8)                                              | 90% <sup>[S5,6]</sup>  | 6-7 s             | 20 s         |
| Mre11              | 81 (108)                                      | 5.4 (5.4)                                              | 95% <sup>[S7]</sup>    | 3 s               | 30 s         |
| Ku80               | 82 (109)                                      | 5.4 (5.4)                                              | 90% <sup>[S8]</sup>    | 1 s               | 3 s          |
| NBS1               | 85 (112)                                      | 6.2 (5.9)                                              | 95% <sup>[S9,10]</sup> | 0.5 s             | 3 s          |
| dCas9              | 158 (185)                                     | 8.2 (7.8)                                              |                        |                   |              |
| MDC1               | 196 (223)                                     | 5.0 (5.1)                                              | 95% <sup>[S9,10]</sup> | 2 s               | 7 s          |
| BRCA1              | 208 (235)                                     | 5.2 (5.2)                                              |                        |                   |              |
| 53BP1              | 214 (241)                                     | 4.5 (4.6)                                              | 100% <sup>[S11]</sup>  | 5 s               | 50 s         |

## References

- S1. Kozlowski, L. P., IPC - Isoelectric Point Calculator. *bioRxiv*. 2016.
- S2. Zheng, C. Y., R. S. Petralia, Y. X. Wang, and B. Kachar, Fluorescence recovery after photobleaching (FRAP) of fluorescence tagged proteins in dendritic spines of cultured hippocampal neurons. *J Vis Exp.* (50), 2011.
- S3. Bosisio, D., I. Marazzi, A. Agresti, N. Shimizu, M. E. Bianchi, and G. Natoli, A hyper-dynamic equilibrium between promoter-bound and nucleoplasmic dimers controls NF-kappaB-dependent gene activity. *EMBO J.* 25 (4):798-810, 2006.
- S4. Gourdin, A. M., L. van Cuijk, M. Tresini, M. S. Luijsterburg, A. L. Nigg, G. Giglia-Mari, A. B. Houtsmuller, W. Vermeulen, and J. A. Marteijn, Differential binding kinetics of replication protein A during replication and the pre- and post-incision steps of nucleotide excision repair. *DNA Repair (Amst)*. 24:46-56, 2014.
- S5. Rodgers, W., S. J. Jordan, and J. D. Capra, Transient association of Ku with nuclear substrates characterized using fluorescence photobleaching. *J Immunol.* 168 (5):2348-55, 2002.
- S6. Byrum, J., S. Jordan, S. T. Safrany, and W. Rodgers, Visualization of inositol phosphate-dependent mobility of Ku: depletion of the DNA-PK cofactor InsP6 inhibits Ku mobility. *Nucleic Acids Res.* 32 (9):2776-84, 2004.
- S7. Boisvert, F. M., M. J. Hendzel, J. Y. Masson, and S. Richard, Methylation of MRE11 regulates its nuclear compartmentalization. *Cell Cycle.* 4 (7):981-9, 2005.
- S8. Mari, P. O., B. I. Florea, S. P. Persengiev, N. S. Verkaik, H. T. Bruggenwirth, M. Modesti, G. Giglia-Mari, K. Bezstarosti, J. A. Demmers, T. M. Luiders, A. B. Houtsmuller, and D. C. van Gent, Dynamic assembly of end-joining complexes requires interaction between Ku70/80 and XRCC4. *Proc Natl Acad Sci U S A.* 103 (49):18597-602, 2006.
- S9. Lukas, C., F. Melander, M. Stucki, J. Falck, S. Bekker-Jensen, M. Goldberg, Y. Lereenthal, S. P. Jackson, J. Bartek, and J. Lukas, Mdc1 couples DNA double-strand break recognition by Nbs1 with its H2AX-dependent chromatin retention. *EMBO J.* 23 (13):2674-83, 2004.
- S10. Tobias, F., D. Lob, N. Lengert, M. Durante, B. Drossel, G. Taucher-Scholz, and B. Jakob, Spatiotemporal dynamics of early DNA damage response proteins on complex DNA lesions. *PLoS One.* 8 (2):e57953, 2013.



S11. Bekker-Jensen, S., C. Lukas, F. Melander, J. Bartek, and J. Lukas, Dynamic assembly and sustained retention of 53BP1 at the sites of DNA damage are controlled by Mdc1/NFBD1. *J Cell Biol.* 170 (2):201-11, 2005.
